# Supplementary material for: The Landscape of Videofluoroscopy in the UK: A Web-Based Survey
Source: Springer Nature journal article supplement (doi:10.1007/s00455-020-10130-1), 2020-05-16

# Videofluoroscopy (VFS) Clinic Survey

\*Required

## 1. What is your profession? \*

Mark only one oval.

- Speech and Language Therapist
- Radiologist
- Radiographer

## 2. Hospital name \*

\_\_\_\_\_

## 3. City \*

\_\_\_\_\_

## Who is involved in VFS?

If you have more than 1 type of VFS clinic - please answer the questions for your main clinic. You will have a chance to give answers for any further clinics your service runs in the next section.

## 4. How many VFS slots are available per week?

\_\_\_\_\_

## 5. How many Speech and Language Therapists (SLTs) conduct the clinic?

Mark only one oval.

- 1
- 2
- Other: \_\_\_\_\_

## 6. What Band SLT(s)?

\_\_\_\_\_

## 7. How many SLTs are involved with analysis?

Mark only one oval.

- 1
- 2
- Other: \_\_\_\_\_

## 8. Is a Radiologist present?

Mark only one oval.

- Yes
- No
- Other: \_\_\_\_\_

**9. If not is a Radiologist available to review images?***Mark only one oval.*

- Yes
- No
- Other: \_\_\_\_\_

**10. Is a Radiographer present?***Mark only one oval.*

- Yes
- No
- Other: \_\_\_\_\_

**11. Has the Radiographer received specialist VFS training?***Mark only one oval.*

- Yes
- No
- Don't know
- N/A
- Other: \_\_\_\_\_

**12. How much is the Radiographer involved in interpreting?***Tick all that apply.*

- Not at all
- Assist in the analysis of the oesophageal stage
- Assist in the analysis of the oropharyngeal stages
- Both oropharyngeal & oesophageal stages
- Other: \_\_\_\_\_

**13. If the VFS is SLT led, who acts as the IRMER Operator?***Mark only one oval.*

- SLT
- Radiographer
- Don't know
- N/A
- Other: \_\_\_\_\_

**14. Do you have another clinic set up in a different way?***Mark only one oval.*

- Yes
- No *Skip to question 24.*

**Second clinic operated differently?**

This time answer the questions based on your second clinic, if you do not have a second clinic ignore this section.

**15. How many Speech and Language Therapists (SLTs) conduct the clinic?***Mark only one oval.*

- 1
- 2
- Other: \_\_\_\_\_

**16. What Band SLT(s)?**

\_\_\_\_\_

**17. How many SLTs are involved with analysis***Mark only one oval.*

- 1
- 2
- Other: \_\_\_\_\_

**18. Is a Radiologist present?***Mark only one oval.*

- Yes
- No
- Other: \_\_\_\_\_

**19. If not, is a Radiologist available to review images?***Mark only one oval.*

- Yes
- No
- N/A
- Other: \_\_\_\_\_

**20. Is a Radiographer present?***Mark only one oval.*

- Yes
- No
- Other: \_\_\_\_\_

**21. Has the Radiographer received specialist VFS training?***Mark only one oval.*

- Yes
- No
- Don't know
- Other: \_\_\_\_\_

**22. How much is the Radiographer involved in interpreting?***Tick all that apply.*

- Not at all
- Assist in the analysis of the oesophageal stage
- Assist in the analysis of the oro-pharyngeal stage
- Both oropharyngeal & oesophageal stages
- Other: \_\_\_\_\_

**23. If the VFS is SLT led, who acts as the IRMER operator?***Mark only one oval.*

- SLT
- Radiographer
- Don't know
- N/A
- Other: \_\_\_\_\_

## Standard Protocols

**24. Do you follow a standardized protocol for the assessment?***Mark only one oval.*

- Yes
- No
- Don't know
- Other: \_\_\_\_\_

**25. Protocol details**

Please write the name of any published protocols you use or 'in house' if developed in house.

---

**26. Is it used consistently by all therapists?***Mark only one oval.*

- Yes
- No
- N/A
- Other: \_\_\_\_\_

**27. Do you use a standardized protocol for interpreting/ reporting?***Mark only one oval.*

- Yes
- No
- Don't know

**28. Analysis protocol**

Please write the name of any published protocols you use or 'in house' if developed in house.

---

**29. Is it used consistently by all therapists?**

Mark only one oval.

- Yes
- No
- N/A
- Other: \_\_\_\_\_

**30. Which rating scales do you use?**

E.G for aspiration, residue or impairment

---

---

---

---

---

**31. Do you do frame by frame analysis?**

Mark only one oval.

- Yes
- No, don't need to
- No, unable to
- Other: \_\_\_\_\_

**32. What % contrast to fluid/food do you use ?**

I.e. what weight/volume to volume do you use?  
If you do not know, write N/K below

---

**33. What textures do you trial?***Tick all that apply.*

- Normal/thin fluids
- UK descriptors Stage 1/Syrup
- UK descriptors Stage 2/Custard
- UK descriptors Stage 3/Pudding
- IDDSI Level 1 fluids
- IDDSI Level 2 fluids
- IDDSI Level 3 fluids
- Puree diet
- Premashed/Mince and moist diet
- Forkmashable/Soft and bitesized diet
- Normal/Regular diet
- Other: \_\_\_\_\_

**34. What contrast do you use?**

Please give details of all the contrasts you use. If unknown please write N/K below.

---



---



---



---



---

**35. Do you have set recipes?**

Do you have a standard set of detailed recipes for each texture trialled i.e. 60ml of juice, 40ml barium, 1/2 scoop thickener?

*Tick all that apply.*

- Yes
- No
- Other: \_\_\_\_\_

**Xray set up****36. Do you use fluoroscopy only?***Mark only one oval.*

- Yes
- No
- Don't know
- Other: \_\_\_\_\_

**37. Do you use fluorograb?***Mark only one oval.*

- Yes
- No
- Don't know
- Other: \_\_\_\_\_

**38. Do you use spot images?***Mark only one oval.*

- Yes
- No
- Don't know
- Other: \_\_\_\_\_

**39. Do you scan the oesophagus?***Mark only one oval.*

- Yes
- No
- Other: \_\_\_\_\_

**40. Do you use continuous or pulsed fluoroscopy?***Mark only one oval.*

- Continuous
- Pulsed
- Don't know
- Other: \_\_\_\_\_

**41. What fluoroscopy pulse rate do you typically use?***Mark only one oval.*

- Less than 15pps
- 15pps
- 30 pps
- Don't know
- N/A
- Other: \_\_\_\_\_

**42. What frame rate do you use?***Mark only one oval.*

- Less than 15fps
- 15fps
- 25fps
- 30fps
- Don't know
- Other: \_\_\_\_\_

**43. How do you record data?***Mark only one oval.*

- Hospital system
- Kay Pentax
- Video
- DVD
- Digital
- Other: \_\_\_\_\_

**44. Do you record sound?***Mark only one oval.*

- Yes
- No
- Unable to
- Don't know
- Other: \_\_\_\_\_

**45. What fluoroscopy mode do you typically use?***Mark only one oval.*

- Low
- Normal
- High
- Don't know
- Other: \_\_\_\_\_

**46. What is the age of the fluoroscopy X-ray system?***Mark only one oval.*

- < 5 years
- 5 to 10 years
- Older than 10 years
- Don't know
- Other: \_\_\_\_\_



**47. Do you use specialised fluoroscopy protocols for paediatric patients (if relevant)?**

*Mark only one oval.*

- No paediatric clinic
- Yes
- No
- Don't know
- Other: \_\_\_\_\_

**48. If yes please specify**

---

---

---

---

---

**49. Have you received any IRMER training as an Operator?**

*Mark only one oval.*

- Yes
- No
- Don't know
- Other: \_\_\_\_\_

**50. What is your usual screening time?**

If you do not know, write N/K below. If you know an average range i.e. 2-4 minutes please write this

---

**51. Do you have a maximum screening time?**

*Mark only one oval.*

- Yes
- No
- Don't know
- Other: \_\_\_\_\_

**52. If yes, what is it?**

---

**53. Do you have any problems with image quality for VFS analysis?**

*Tick all that apply.*

- No problems/Good quality image
- Unable to visualise all structures
- Pulse/frame rate too low
- Image contrast poor
- Recording does not capture swallow from start to end
- Poor definition
- Other: \_\_\_\_\_

**54. Is your department able to carry out manofluoroscopy?**

Manofluoroscopy = manometry + videofluoroscopy

*Mark only one oval.*

- Yes
- No
- Don't know
- Other: \_\_\_\_\_

**Other comments**

Please write any other comments related to your videofluoroscopy clinic which you wish to share.

**55. Comments**

---

---

---

---

---

Powered by

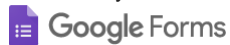

Supplement: MOESM1 [file 17988780]
