# Supplementary material for: The Landscape of Videofluoroscopy in the UK: A Web-Based Survey
Source: Springer Nature journal article supplement (doi:10.1007/s00455-020-10130-1), 2020-05-16
Supplement: MOESM2 [file 17988780]

# The Landscape of Videofluoroscopy in the UK: A web-based survey

## Dysphagia

Benfield, J.K., Michou, E., Everton, L.F., Mills, C., Hamdy, S., Bath, P.M., England, T.J.

Electronic Supplementary Material 2

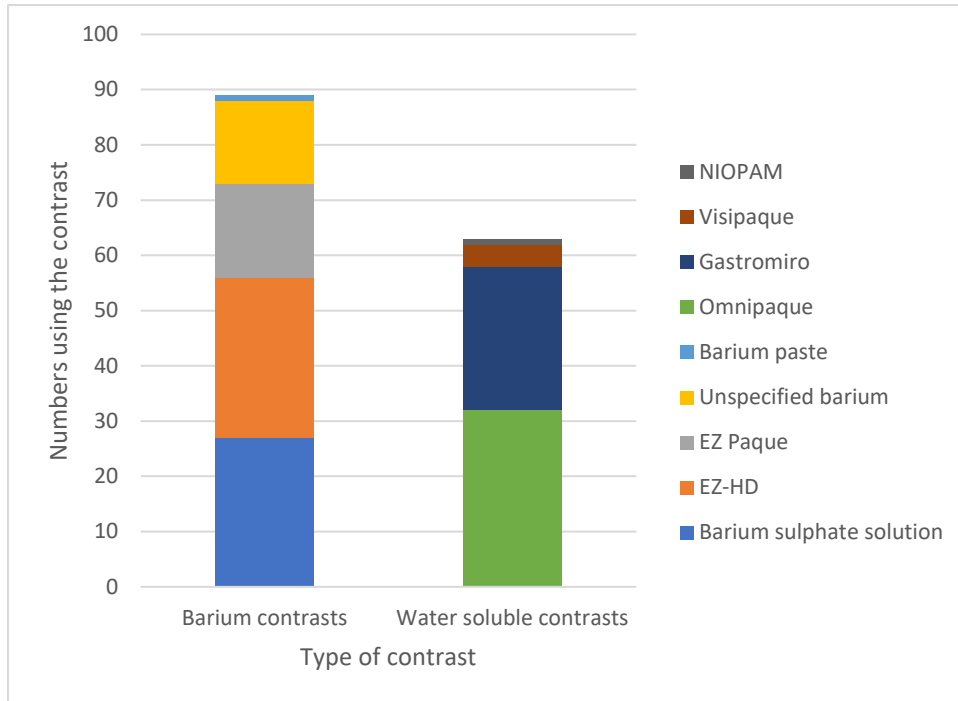

The types and varieties of contrast and their frequency of use in VFS clinics.
