# Supplementary material for: The Landscape of Videofluoroscopy in the UK: A Web-Based Survey
Source: Springer Nature journal article supplement (doi:10.1007/s00455-020-10130-1), 2020-05-16
Supplement: MOESM3 [file 17988780]

# The Landscape of Videofluoroscopy in the UK: A web-based survey

## Dysphagia

Benfield, J.K., Michou, E., Everton, L.F., Mills, C., Hamdy, S., Bath, P.M., England, T.J.

### Electronic Supplementary Material 3: Imaging mode and frame rate

| Type of screening  | Frame rate (frames per second) |                             |                         |                             |                         |                             |                         | Total      |
|--------------------|--------------------------------|-----------------------------|-------------------------|-----------------------------|-------------------------|-----------------------------|-------------------------|------------|
|                    | Less than 15                   | 15                          | 25                      | 30                          | Mix of 30 and $\leq 15$ | Don't know                  | No response             |            |
| Continuous         | 5                              | 14                          | 2                       | 14                          | 2                       | 13                          | 1                       | 51         |
| Pulsed             | 2                              | 10                          |                         | 3                           | 1                       | 6                           |                         | 22         |
| Both               |                                | 1                           |                         |                             |                         |                             |                         | 1          |
| Don't know         | 5                              | 6                           |                         | 5                           |                         | 11                          |                         | 27         |
| <b>Grand Total</b> | <b>12</b><br><b>(11.9%)</b>    | <b>31</b><br><b>(30.7%)</b> | <b>2</b><br><b>(2%)</b> | <b>22</b><br><b>(21.8%)</b> | <b>3</b><br><b>(3%)</b> | <b>30</b><br><b>(29.7%)</b> | <b>1</b><br><b>(1%)</b> | <b>101</b> |
